# Supplementary material for: Physical interactions between Gsx2 and Ascl1 balance progenitor expansion versus neurogenesis in the mouse lateral ganglionic eminence
Source: Oxford University Press journal article supplement (doi:10.1242/dev.185348), 2020-03-02
Supplement: dev185348supp.pdf [file dev185348supp.pdf]

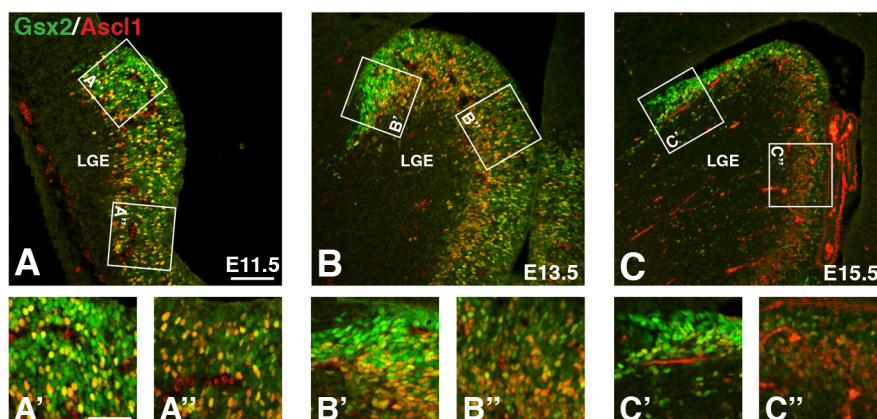

**Figure S1. Co-expression of Gsx2 and Ascl1 in LGE progenitors over early neurogenic timepoints.** Double immunohistochemistry for Gsx2 and Ascl1 in tissue sections from E11.5 (A), E13.5 (B) and E15.5 (C) mouse telencephalon. Boxed areas represent the VZ regions quantified for the dLGE (A', B', C') and the vLGE (A'', B'', C''). Boxes have been rotated so that the apical surface is at the top of all images in A', A'', B', B'', C' and C''. Results from the quantification are presented in Fig. 1H, I. Scale bars in A-C=100 $\mu$ m; A'-C''=50 $\mu$ m.

### Ascl1 bHLH

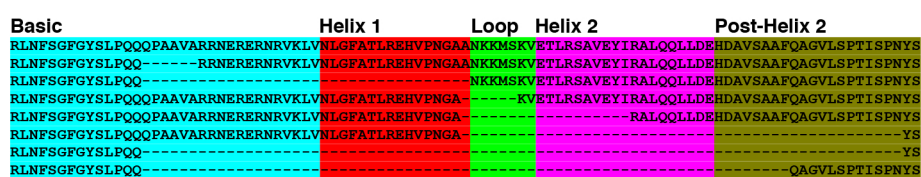

**Figure S2. Deletion constructs in the Ascl1 bHLH.** Amino acid sequence of the bHLH domain in Ascl1 and subsequent deletion mutations tested in the yeast 2-hybrid interaction assays with Gsx2 shown in Fig. 5F.

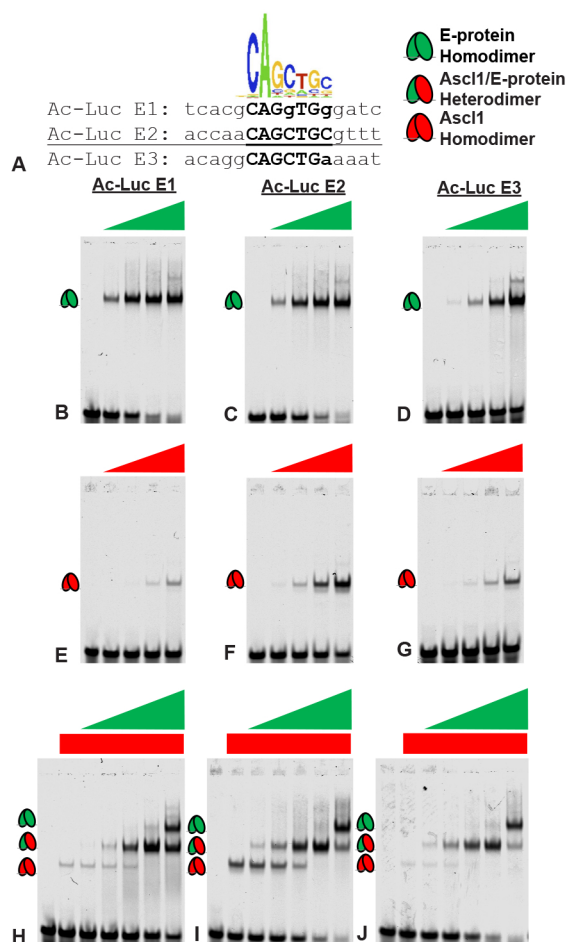

**Figure S3. Ascl1 homodimers and heterodimers bind the 3 E-boxes from the Ac-luciferase reporter with varying affinities.** A) Sequence logo for Ascl1 binding determined via ChIP on CHIP assay (Castro et al., 2011), and the E-box sequences from the Ac-Luciferase reporter used as probes in EMSAs. Matches to perfect Ascl1 binding site are capitalized. B-D) Binding of increasing levels of E-protein as E47-E47 homodimers to E-boxes from Ac-Luc B) E1, C) E2, and D) E3. E-G) Binding of increasing levels of Ascl1 as Ascl1-Ascl1 homodimers to E-boxes from Ac-Luc E) E1, F) E2, and G) E3. H-J) Binding of Ascl1 added at constant levels with increasing levels of E-protein as Ascl1-Ascl1 homodimers, Ascl1-E47 heterodimers, and E47-E47 homodimers to E-boxes from Ac-Luc H) E1, I) E2, and J) E3.

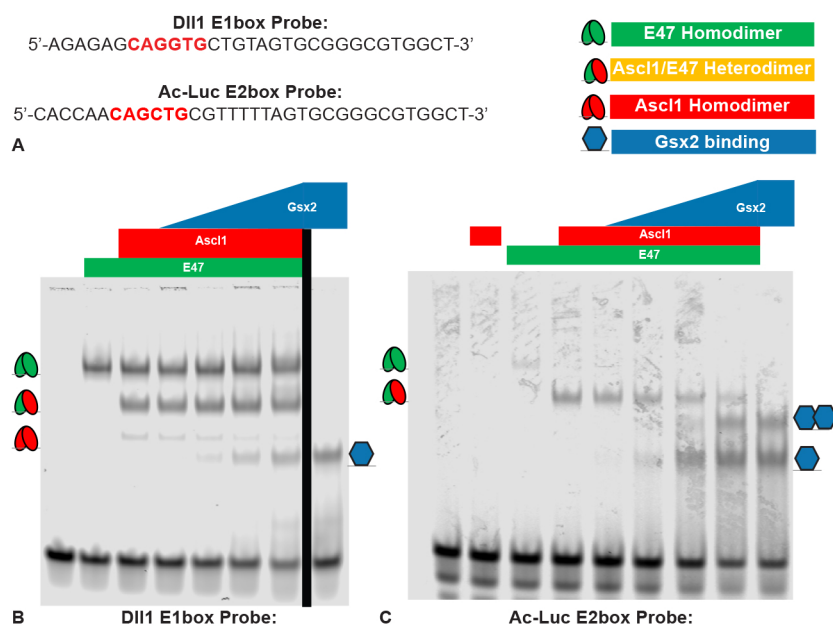

**Figure S4. Wild type Gsx2 protein interferes with Ascl1 homodimer and heterodimer binding to E-box DNA sequences.** A) Sequences of the E-box DNA probes used in EMSAs shown in B-C, and cartoons indicating the different complexes observed in EMSAs. B) Ascl1 (5 pmoles) and E-protein (1.25 pmoles) were added in each lane marked by red and green bars respectively with increasing levels of Gsx2 protein from 0 to 30 pmoles indicated by the blue triangle. Each lane contained 0.64 pmoles of the Dll1 E1box DNA probe. Note, the black line separates the Gsx2 only lane at right that was run on the same gel but moved adjacent to the other lanes for comparative purposes. C) Ascl1 (0.156 pmoles) and E-protein (0.078 pmoles) were added in each lane marked by red and green bars respectively with increasing levels of Gsx2 protein from 0 to 40 pmoles. Each lane contained 0.04 pmoles of the E2box DNA probe from Ac-Luc.

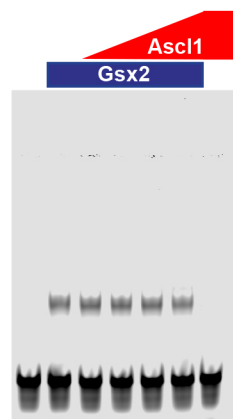

**Figure S5. Ascl1 has no effect on Gsx2 DNA binding** Protein binding microarray data for mouse Gsx2 was used to generate a predicted, high affinity Gsx2 binding site (see Berger et al., 2008). EMSA shows binding of a constant amount of Gsx2 to a probe containing this high affinity site with increasing levels of Ascl1 added in each lane.

**Table S1. Genes enriched in distinct cell clusters in the developing mouse ventral telencephalon at E12.5.**

[Click here to download Table S1](#)

**Table S2. Genes enriched in Gsx2+ and/or Ascl1+ LGE progenitors.**

| Gene    | p_val     | avg_logFC | pct.1 | pct.2 | p_val_adj | Cluster     |
|---------|-----------|-----------|-------|-------|-----------|-------------|
| Gsx2    | 0         | 0.86161   | 1.000 | 0.107 | 0         | Gsx2+Ascl1+ |
| Ascl1   | 2.19E-191 | 0.65296   | 1.000 | 0.566 | 4.08E-187 | Gsx2+Ascl1+ |
| Gadd45g | 2.70E-71  | 0.56279   | 0.599 | 0.343 | 5.02E-67  | Gsx2+Ascl1+ |
| Dlx1    | 2.39E-63  | 0.45537   | 0.732 | 0.502 | 4.44E-59  | Gsx2+Ascl1+ |
| Dlx2    | 2.78E-74  | 0.43268   | 0.832 | 0.604 | 5.18E-70  | Gsx2+Ascl1+ |
| Hes6    | 3.62E-72  | 0.41834   | 0.818 | 0.588 | 6.73E-68  | Gsx2+Ascl1+ |
| Sox4    | 1.28E-69  | 0.36637   | 0.995 | 0.964 | 2.38E-65  | Gsx2+Ascl1+ |
| Dll1    | 7.80E-65  | 0.29207   | 0.474 | 0.233 | 1.45E-60  | Gsx2+Ascl1+ |
| Helt    | 2.57E-47  | 0.29037   | 0.242 | 0.092 | 4.78E-43  | Gsx2+Ascl1+ |
| Dll3    | 3.62E-48  | 0.27996   | 0.424 | 0.224 | 6.72E-44  | Gsx2+Ascl1+ |
| Dleu7   | 2.73E-35  | 0.25662   | 0.406 | 0.237 | 5.07E-31  | Gsx2+Ascl1+ |
| Dlx6os1 | 5.12E-38  | 0.45336   | 0.366 | 0.217 | 9.51E-34  | Ascl1+      |
| Ascl1   | 3.01E-189 | 0.44689   | 1.000 | 0.473 | 5.60E-185 | Ascl1+      |
| Abrac1  | 2.46E-39  | 0.43215   | 0.873 | 0.810 | 4.57E-35  | Ascl1+      |
| Sp9     | 1.30E-38  | 0.41413   | 0.419 | 0.256 | 2.42E-34  | Ascl1+      |
| Tubb3   | 2.20E-42  | 0.38288   | 0.835 | 0.748 | 4.09E-38  | Ascl1+      |
| Sox11   | 1.01E-60  | 0.36496   | 0.967 | 0.935 | 1.88E-56  | Ascl1+      |
| Cited2  | 8.90E-50  | 0.34948   | 0.715 | 0.553 | 1.65E-45  | Ascl1+      |
| Dlx5    | 1.75E-35  | 0.34670   | 0.363 | 0.211 | 3.25E-31  | Ascl1+      |
| Insm1   | 5.37E-57  | 0.33358   | 0.577 | 0.361 | 9.97E-53  | Ascl1+      |
| Gad2    | 1.19E-32  | 0.31832   | 0.395 | 0.252 | 2.20E-28  | Ascl1+      |
| Igfbpl1 | 4.42E-27  | 0.31543   | 0.346 | 0.224 | 8.22E-23  | Ascl1+      |
| Mpped2  | 3.16E-16  | 0.31180   | 0.610 | 0.542 | 5.87E-12  | Ascl1+      |
| Cd24a   | 1.24E-33  | 0.29979   | 0.712 | 0.603 | 2.30E-29  | Ascl1+      |
| Pak3    | 2.56E-30  | 0.29945   | 0.676 | 0.562 | 4.77E-26  | Ascl1+      |
| Nrxn3   | 1.15E-30  | 0.29811   | 0.393 | 0.257 | 2.13E-26  | Ascl1+      |
| Dlx1    | 9.60E-36  | 0.28847   | 0.659 | 0.503 | 1.78E-31  | Ascl1+      |
| Arx     | 2.89E-23  | 0.28840   | 0.541 | 0.432 | 5.37E-19  | Ascl1+      |
| Gadd45g | 4.32E-29  | 0.28682   | 0.508 | 0.351 | 8.03E-25  | Ascl1+      |
| Dpysl3  | 8.96E-21  | 0.28124   | 0.569 | 0.477 | 1.67E-16  | Ascl1+      |
| Ccnd2   | 7.31E-32  | 0.27983   | 0.942 | 0.907 | 1.36E-27  | Ascl1+      |
| Elavl3  | 7.52E-38  | 0.27416   | 0.757 | 0.643 | 1.40E-33  | Ascl1+      |
| Dlx2    | 2.91E-32  | 0.27287   | 0.736 | 0.622 | 5.42E-28  | Ascl1+      |
| Mfng    | 2.87E-47  | 0.26772   | 0.580 | 0.389 | 5.34E-43  | Ascl1+      |
| Hes6    | 2.76E-34  | 0.26415   | 0.731 | 0.599 | 5.14E-30  | Ascl1+      |
| Sox4    | 5.11E-45  | 0.25396   | 0.989 | 0.962 | 9.50E-41  | Ascl1+      |
| Top2b   | 7.62E-38  | 0.25070   | 0.869 | 0.797 | 1.42E-33  | Ascl1+      |
| Fabp7   | 4.43E-72  | 1.05892   | 0.959 | 0.831 | 8.23E-68  | Gsx2+       |
| Ptn     | 1.21E-68  | 0.76159   | 0.949 | 0.744 | 2.24E-64  | Gsx2+       |
| Mt3     | 2.35E-42  | 0.61585   | 0.888 | 0.661 | 4.36E-38  | Gsx2+       |
| Mest    | 1.18E-37  | 0.58710   | 0.788 | 0.570 | 2.19E-33  | Gsx2+       |
| Slc1a3  | 1.65E-54  | 0.52919   | 0.781 | 0.420 | 3.07E-50  | Gsx2+       |
| Gsx2    | 2.29E-147 | 0.51121   | 1.000 | 0.304 | 4.25E-143 | Gsx2+       |
| Ttyh1   | 5.18E-51  | 0.50879   | 0.808 | 0.491 | 9.63E-47  | Gsx2+       |
| Rgcc    | 3.57E-44  | 0.50487   | 0.835 | 0.535 | 6.64E-40  | Gsx2+       |
| Epha5   | 1.56E-31  | 0.47750   | 0.803 | 0.603 | 2.90E-27  | Gsx2+       |
| Dbi     | 2.31E-44  | 0.45934   | 0.993 | 0.976 | 4.30E-40  | Gsx2+       |
| Ptprz1  | 1.02E-40  | 0.45419   | 0.976 | 0.846 | 1.89E-36  | Gsx2+       |
| Hmga2   | 8.59E-45  | 0.45133   | 0.781 | 0.476 | 1.60E-40  | Gsx2+       |
| Pmm1    | 1.17E-40  | 0.44712   | 0.827 | 0.558 | 2.17E-36  | Gsx2+       |

|         |           |         |       |       |           |                 |
|---------|-----------|---------|-------|-------|-----------|-----------------|
| Rbp1    | 1.36E-37  | 0.44106 | 0.978 | 0.916 | 2.53E-33  | Gsx2+           |
| Ppp1r1a | 9.26E-49  | 0.43181 | 0.603 | 0.276 | 1.72E-44  | Gsx2+           |
| Fgfbp3  | 1.24E-42  | 0.42843 | 0.720 | 0.395 | 2.30E-38  | Gsx2+           |
| Fam181b | 7.84E-38  | 0.42655 | 0.732 | 0.459 | 1.46E-33  | Gsx2+           |
| Ntrk2   | 2.51E-27  | 0.40735 | 0.538 | 0.295 | 4.66E-23  | Gsx2+           |
| Ddah1   | 1.43E-40  | 0.40346 | 0.951 | 0.817 | 2.66E-36  | Gsx2+           |
| Sparc   | 3.16E-37  | 0.40186 | 0.757 | 0.452 | 5.87E-33  | Gsx2+           |
| Id4     | 1.77E-38  | 0.39535 | 0.835 | 0.537 | 3.30E-34  | Gsx2+           |
| Vim     | 1.63E-46  | 0.39429 | 0.993 | 0.985 | 3.03E-42  | Gsx2+           |
| Rorb    | 3.19E-39  | 0.38459 | 0.684 | 0.388 | 5.94E-35  | Gsx2+           |
| Ptx3    | 2.12E-35  | 0.38445 | 0.616 | 0.323 | 3.94E-31  | Gsx2+           |
| Pea15a  | 1.75E-36  | 0.38231 | 0.895 | 0.689 | 3.26E-32  | Gsx2+           |
| Arhgap5 | 1.46E-32  | 0.37832 | 0.864 | 0.708 | 2.72E-28  | Gsx2+           |
| Phgdh   | 1.09E-34  | 0.37781 | 0.951 | 0.825 | 2.02E-30  | Gsx2+           |
| Asrgl1  | 4.33E-31  | 0.37290 | 0.710 | 0.471 | 8.04E-27  | Gsx2+           |
| Lix1    | 6.80E-20  | 0.35816 | 0.757 | 0.609 | 1.26E-15  | Gsx2+           |
| Sfrp1   | 2.95E-34  | 0.34454 | 0.959 | 0.806 | 5.48E-30  | Gsx2+           |
| Lxn     | 1.96E-23  | 0.33412 | 0.577 | 0.342 | 3.64E-19  | Gsx2+           |
| Sall3   | 4.31E-29  | 0.33288 | 0.706 | 0.443 | 8.02E-25  | Gsx2+           |
| Tubb2a  | 3.65E-18  | 0.33287 | 0.766 | 0.625 | 6.78E-14  | Gsx2+           |
| Psat1   | 1.92E-25  | 0.31479 | 0.791 | 0.576 | 3.57E-21  | Gsx2+           |
| Ldha    | 6.84E-15  | 0.30961 | 0.922 | 0.836 | 1.27E-10  | Gsx2+           |
| Pkdcc   | 1.77E-23  | 0.30786 | 0.594 | 0.348 | 3.30E-19  | Gsx2+           |
| Cpe     | 5.06E-22  | 0.30004 | 0.822 | 0.631 | 9.41E-18  | Gsx2+           |
| Cst3    | 5.42E-25  | 0.29959 | 0.946 | 0.876 | 1.01E-20  | Gsx2+           |
| Slc12a2 | 1.06E-16  | 0.29949 | 0.662 | 0.463 | 1.97E-12  | Gsx2+           |
| Jun     | 9.92E-23  | 0.29926 | 0.910 | 0.738 | 1.84E-18  | Gsx2+           |
| Hspa5   | 6.22E-25  | 0.29834 | 0.949 | 0.852 | 1.16E-20  | Gsx2+           |
| Calr    | 1.15E-22  | 0.29660 | 0.951 | 0.867 | 2.13E-18  | Gsx2+           |
| Hs3st1  | 2.41E-58  | 0.29633 | 0.282 | 0.061 | 4.49E-54  | Gsx2+           |
| Aldoa   | 1.09E-18  | 0.29528 | 0.910 | 0.831 | 2.03E-14  | Gsx2+           |
| Stk39   | 3.70E-25  | 0.28882 | 0.618 | 0.386 | 6.88E-21  | Gsx2+           |
| Oat     | 9.21E-23  | 0.28616 | 0.835 | 0.662 | 1.71E-18  | Gsx2+           |
| Kbtbd11 | 2.70E-26  | 0.28598 | 0.504 | 0.263 | 5.02E-22  | Gsx2+           |
| Khdrbs3 | 9.30E-10  | 0.28582 | 0.827 | 0.758 | 1.73E-05  | Gsx2+           |
| Ldhb    | 2.70E-22  | 0.28575 | 0.976 | 0.916 | 5.03E-18  | Gsx2+           |
| Hes1    | 1.02E-21  | 0.28019 | 0.664 | 0.420 | 1.89E-17  | Gsx2+           |
| Gpm6b   | 4.18E-22  | 0.27427 | 0.888 | 0.769 | 7.77E-18  | Gsx2+           |
| Ednrb   | 6.96E-24  | 0.27208 | 0.735 | 0.488 | 1.29E-19  | Gsx2+           |
| Ntm     | 1.28E-20  | 0.26880 | 0.460 | 0.259 | 2.38E-16  | Gsx2+           |
| Plpp3   | 1.65E-22  | 0.26862 | 0.837 | 0.619 | 3.06E-18  | Gsx2+           |
| Tpi1    | 3.15E-18  | 0.26843 | 0.910 | 0.802 | 5.86E-14  | Gsx2+           |
| Pcdh10  | 1.35E-20  | 0.26816 | 0.655 | 0.428 | 2.52E-16  | Gsx2+           |
| Creb5   | 4.09E-22  | 0.26106 | 0.596 | 0.357 | 7.61E-18  | Gsx2+           |
| Cspg5   | 1.46E-20  | 0.26000 | 0.637 | 0.401 | 2.71E-16  | Gsx2+           |
| Hey1    | 5.39E-22  | 0.25648 | 0.406 | 0.211 | 1.00E-17  | Gsx2+           |
| Sox9    | 2.79E-19  | 0.25236 | 0.808 | 0.617 | 5.19E-15  | Gsx2+           |
| Fabp7   | 5.24E-66  | 0.63531 | 0.904 | 0.822 | 9.73E-62  | double negative |
| Id4     | 7.58E-114 | 0.61691 | 0.750 | 0.501 | 1.41E-109 | double negative |
| Mest    | 5.17E-64  | 0.56229 | 0.725 | 0.544 | 9.62E-60  | double negative |
| Ptn     | 2.83E-62  | 0.50068 | 0.866 | 0.727 | 5.26E-58  | double negative |
| Mt3     | 5.71E-48  | 0.44937 | 0.775 | 0.648 | 1.06E-43  | double negative |
| Fgfbp3  | 1.24E-55  | 0.44364 | 0.582 | 0.370 | 2.30E-51  | double negative |



|         |          |         |       |       |          |                 |
|---------|----------|---------|-------|-------|----------|-----------------|
| Sparc   | 7.97E-55 | 0.42793 | 0.639 | 0.425 | 1.48E-50 | double negative |
| Ptx3    | 1.90E-57 | 0.39797 | 0.516 | 0.293 | 3.53E-53 | double negative |
| Pmm1    | 1.91E-62 | 0.38890 | 0.721 | 0.535 | 3.56E-58 | double negative |
| Slc1a3  | 7.63E-47 | 0.38272 | 0.596 | 0.402 | 1.42E-42 | double negative |
| Ttyh1   | 6.54E-51 | 0.37876 | 0.676 | 0.465 | 1.22E-46 | double negative |
| Hmga2   | 1.24E-51 | 0.37028 | 0.646 | 0.454 | 2.31E-47 | double negative |
| Calr    | 9.75E-59 | 0.36151 | 0.905 | 0.864 | 1.81E-54 | double negative |
| Hspa5   | 2.42E-46 | 0.34914 | 0.884 | 0.852 | 4.50E-42 | double negative |
| Rgcc    | 3.44E-40 | 0.34766 | 0.696 | 0.515 | 6.40E-36 | double negative |
| Cntnap2 | 8.85E-54 | 0.34079 | 0.343 | 0.156 | 1.65E-49 | double negative |
| Pea15a  | 1.10E-50 | 0.33050 | 0.806 | 0.673 | 2.04E-46 | double negative |
| Hes1    | 8.15E-38 | 0.32452 | 0.580 | 0.395 | 1.51E-33 | double negative |
| Vim     | 4.60E-59 | 0.32189 | 0.982 | 0.987 | 8.55E-55 | double negative |
| Fam181b | 3.29E-27 | 0.31553 | 0.565 | 0.453 | 6.12E-23 | double negative |
| Ptprz1  | 1.69E-36 | 0.31268 | 0.877 | 0.849 | 3.14E-32 | double negative |
| Gm42418 | 1.31E-20 | 0.30261 | 0.994 | 1.000 | 2.44E-16 | double negative |
| Pkdcc   | 6.18E-39 | 0.29685 | 0.511 | 0.323 | 1.15E-34 | double negative |
| Pdia6   | 3.29E-36 | 0.29599 | 0.874 | 0.866 | 6.12E-32 | double negative |
| Jun     | 1.62E-25 | 0.28298 | 0.804 | 0.735 | 3.01E-21 | double negative |
| Sfrp1   | 2.04E-34 | 0.27544 | 0.867 | 0.802 | 3.80E-30 | double negative |
| Ppp1r1a | 1.70E-30 | 0.26908 | 0.421 | 0.264 | 3.15E-26 | double negative |
| Ddah1   | 2.16E-34 | 0.26881 | 0.858 | 0.818 | 4.02E-30 | double negative |
| Tubb2a  | 1.44E-20 | 0.26877 | 0.695 | 0.617 | 2.68E-16 | double negative |
| Psat1   | 9.21E-30 | 0.26121 | 0.686 | 0.564 | 1.71E-25 | double negative |
| Scrn1   | 5.66E-28 | 0.25714 | 0.470 | 0.330 | 1.05E-23 | double negative |
| Pdia3   | 1.72E-28 | 0.25566 | 0.792 | 0.743 | 3.19E-24 | double negative |

**Table S3. Plasmids generated for the experiments**

| Insert                 | Amino Acids         | Source                            | Destination<br>Vector | Integration<br>site | Method |
|------------------------|---------------------|-----------------------------------|-----------------------|---------------------|--------|
| Gsx2                   | 1-305 (Full length) | pBS SK- mouse clone               | pGBKT7                | EcoR1-BamH1         | PCR    |
| Gsx1                   | 1-261 (Full length) | pBS SK- mouse clone               | pGBKT7                | EcoR1-BamH1         | PCR    |
| Ascl1                  | 1-231 (Full length) | Embryonic mouse telencephalon RNA | pGADT7                | EcoR1-BamH1         | RT-PCR |
| Olig2                  | 1-323 (Full length) | pCAGGS                            | pGADT7                | EcoR1-BamH1         | PCR    |
| Ascl1 NT               | 1-131               | pGADT7 FL clone                   | pGADT7                | EcoR1-BamH1         | PCR    |
| Ascl1 bHLH             | 97-193              | pGADT7 FL clone                   | pGADT7                | EcoR1-BamH1         | PCR    |
| Ascl1 CT               | 193-231             | pGADT7 FL clone                   | pGADT7                | EcoR1-BamH1         | PCR    |
| Ascl1 $\Delta$ 111-116 | $\Delta$ 111-116    | pGADT7 FL clone                   | pGADT7                | EcoR1-BamH1         | PCR    |
| Ascl1 $\Delta$ 111-145 | $\Delta$ 111-145    | pGADT7 FL clone                   | pGADT7                | EcoR1-BamH1         | PCR    |

|                           |                        |                 |         |             |        |
|---------------------------|------------------------|-----------------|---------|-------------|--------|
| Ascl1 $\Delta$<br>145-150 | $\Delta$ 145-150       | pGADT7 FL clone | pGADT7  | EcoR1-BamH1 | PCR    |
| Ascl1 $\Delta$<br>145-162 | $\Delta$ 145-162       | pGADT7 FL clone | pGADT7  | EcoR1-BamH1 | PCR    |
| Ascl1 $\Delta$<br>145-191 | $\Delta$ 145-191       | pGADT7 FL clone | pGADT7  | EcoR1-BamH1 | PCR    |
| Ascl1 $\Delta$<br>111-191 | $\Delta$ 111-191       | pGADT7 FL clone | pGADT7  | EcoR1-BamH1 | PCR    |
| Ascl1 $\Delta$<br>111-179 | $\Delta$ 111-179       | pGADT7 FL clone | pGADT7  | EcoR1-BamH1 | PCR    |
| Gsx2 Y3H<br>MCS1          | 1-305 (Full<br>length) | pCDNA6 FL clone | pBridge | EcoR1-BamH1 | PCR    |
| TCF3 Y3H<br>MCS2          | 1-653 (isoform-1)      | Mouse brain RNA | pBridge | Not1-BglIII | RT-PCR |
| Gsx2 Y3H<br>MCS2          | 1-305 (Full<br>length) | pCDNA6 FL clone | pBridge | Not1-BglIII | PCR    |
| Tcf3 Y3H<br>MCS1          | 1-653 (isoform-1)      | Mouse brain RNA | pBridge | EcoR1-BamH1 | RT-PCR |

|                                    |                                     |                       |                                  |             |            |
|------------------------------------|-------------------------------------|-----------------------|----------------------------------|-------------|------------|
| Tcf3 Y3H<br>MCS1,<br>Gsx2-<br>MCS2 | 1-653 (isoform-1)                   | Mouse brain RNA       | pBridge with<br>Gsx2 Y3H<br>MCS2 | EcoR1-BamH1 | PCR        |
| Tcf3 Y3H<br>MCS1                   | 1-653 (isoform-1)                   | Mouse brain RNA       | pBridge with<br>Gsx2 Y3H<br>MCS2 | EcoR1-BamH1 | PCR        |
| Ascl1                              | 1-231 (Full<br>length)              | pGADT7 clone          | pAC5.1                           | EcoRI-XhoI  | Subcloning |
| Gsx2                               | 1-305 (Full<br>length)              | pCDNA6 FL clone       | pAC5.1                           | XhoI-XbaI   | Subcloning |
| Gsx2                               | N253A<br><br>1-305 (Full<br>length) | pGBKT7 clone          | pAC5.1                           | EcoRV-XhoI  | Subcloning |
| Gsx2                               | 167-305                             | pGBKT7 clone          | pET14b<br>(modified)             | BamH1-NotI  | PCR        |
| Gsx2                               | N253A<br><br>167-305                | pGBKT7 N253A<br>clone | pET14b<br>(modified)             | BamH1-NotI  | PCR        |
| Ascl1                              | 115-231                             | pGADT7 clone          | pET14b<br>(modified)             | NdeI-KpnI   | PCR        |

|                       |                              |                                       |                    |            |                                      |
|-----------------------|------------------------------|---------------------------------------|--------------------|------------|--------------------------------------|
| Asc11                 | 1-231 (Full length)          | pGADT7 FL clone                       | pCDNA6             | EcoRI-XhoI | PCR                                  |
| Gsx2                  | 1-305 (Full length)          | pGBKT7 clone                          | pCDNA6             | EcoRV-XhoI | subcloning                           |
| Gsx2                  | N253A<br>1-305 (Full length) | pGBKT7 clone                          | pCDNA6             | EcoRV-XhoI | subcloning                           |
| 6xE2box<br>Luciferase |                              | Synthesized oligonucleotides from IDT | Modified pGL3basic | KpnI-BamHI | Cloning of annealed oligonucleotides |

**Table S4. PCR primers used in cloning**

| Construct (amino acids) | destination vector | Forward primer                                       | Reverse primer                                               |
|-------------------------|--------------------|------------------------------------------------------|--------------------------------------------------------------|
| Ascl1(1-231)            | pAc5.1             | CAGTGTGGTGGAAATTCATGGAGAGCTCTGGCAAGAT                | GCCCTCTAGACTCGAGTCAGAACCAGTTGGTA AAGTCCA                     |
| Gsx2N253A (1-305)       | pGBKT7             | CTGAAACCAGATTTTTCACCTGC                              | AAAATCTGGTTTCAGGCCCGTCGCGTGAAGCA CAAGA                       |
| Gsx2 (167-305)          | pET14b             | GTACGGATCCGCAGCACACGCACCTGT C                        | GTACGCGGCCGCTTACAAGGGGGAAATCTCCT TGTC                        |
| Gsx2N253A (167-305)     | pET14b             | GTACGGATCCGCAGCACACGCACCTGT C                        | GTACGCGGCCGCTTACAAGGGGGAAATCTCCT TGTC                        |
| Ascl1(115-231)          | pET14b             | GTACATATGGTGGCGCGCCGCAACGAGC GC                      | GTAGGTACCTCAGAACCAGTTGGTAAAGTCCA G                           |
| E47(430-648)            | pET14b             | GTACATATGTACTGGGCGGGCGGCATG CC                       | GTAGGTACCTCAGAGTGGCCGGCTGGGTTG                               |
| Gsx2(1-305)             | pGBKT7             | CATGGAGGCCGAATTCAGGACAAGCC ATCCATCGAC                | GCAGGTCGACGGATCCCAGAAGGAGCC TCTGCCTT                         |
| Gsx1(1-261)             | pGBKT7             | CATGGAGGCCGAATTCATGCCGCGCTCC TT                      | GCAGGTCGACGGATCCCTACGGAGTGACTG                               |
| Ascl1(1-231)            | pGADT7             | GGAGGCCAGTGAATTCATGGAGAGCTCT GGCAAGAT                | CGAGCTCGATGGATCCTCAGAACCAGTTGGTA AAGTCCA                     |
| Olig2(1-323)            | pGADT7             | GGAGGCCAGTGAATTCATGGACTCGGAC GCCAGCCT                | CGAGCTCGATGGATCCTCACTTGGCGTCGGAG GTG                         |
| Ascl1 NT (1-131)        | pGADT7             | GGAGGCCAGTGAATTCATGGAGAGCTCT GGCAAGAT                | CGAGCTCGATGGATCCCAGGTTGACCAACTTG AC                          |
| Ascl1 bHLH (97-193)     | pGADT7             | GGAGGCCAGTGAATTCGCTCAACTTCAG CGGCTT                  | CGAGCTCGATGGATCCGGAGTAGTTGGGGGAG AT                          |
| Ascl1 CT (193-231)      | pGADT7             | GGAGGCCAGTGAATTCCTCAACGACTTG AACTCT                  | CGAGCTCGATGGATCCTCAGAACCAGTTGGTA AAGTCCA                     |
| Ascl1 Δ111-116          | pGADT7             | GGCTACAGCCTGCCAGTGGCGCGCCGCA ACGAG                   | TGGCAGGCTGTAGCCGAAGCCGCTGAAGTTGA G                           |
| Ascl1 Δ111-145          | pGADT7             | GGCTACAGCCTGCCAGGCGCGGCCAACA AGAAG                   | TGGCAGGCTGTAGCCGAAGCCGCTGAAGTTGA G                           |
| Ascl1 Δ145-150          | pGADT7             | GAGCATGTCCCCAACATGAGCAAGGTGG AGACG                   | GTTGGGGACATGCTCCCGAGGGTGGCAAAA CC                            |
| Ascl1 Δ145-162          | pGADT7             | GAGCATGTCCCCAACGAGTACATCCGCG CGCTG                   | GTTGGGGACATGCTCCCGAGGGTGGCAAAA CC                            |
| Ascl1 Δ145-191          | pGADT7             | GAGCATGTCCCCAACTCCCCAACTACT CCAAC                    | GTTGGGGACATGCTCCCGAGGGTGGCAAAAC C                            |
| Ascl1 Δ111-191          | pGADT7             | GCTACAGCCTGCCAGCTGCCTTTCAGGC GGGC                    | GTTGGGGACATGCTCCCGAGGGTGGCAAAAC C                            |
| Ascl1 Δ111-179          | pGADT7             | GCTACAGCCTGCCAGCTGCCTTTCAGGC GGGC                    | TGGCAGGCTGTAGCCGAAGCCGCTGAAGTTGA G                           |
| Gsx2 (1-305)            | pBridge MCS1       | TGTATCGCCGGAATTCAGGACAAGCCAT CCATCGAC                | GCAGGTCGACGGATCCAGAAGGAGCCTCTGCC TTT                         |
| TCF3 (1-653)            | pBridge MCS2       | AGAAAGGTGGCGGCCGCAACCAGCCG CAGAGGAT                  | CGGGCTAATGCGGCCCGGAGGCATACCTTTCA CAT                         |
| Gsx2 (1-305)            | pBridge MCS2       | AGAAAGGTGGCGGCCCAGGACAAGCCA TCCATCGAC                | CGGGCTAATGCGGCCCAGAAGGAGCCT CTGCCTT                          |
| Tcf3 (1-653)            | pBridge MCS1       | TGTATCGCCGGAATTCAGGACAAGCCGAG AGGAT                  | GCAGGTCGACGGATCCCGAGGCATACCTTTCA CAT                         |
| 6xE2box Luciferase      | pGL3basic modified | AACAGCTGCGTTTACCAACAGCTGCGTT TACCAACAGCTGCGGTACCGTAG | GATCCTACGGTACCGCAGCTGTTGGTAAACGC AGCTGTTGGTAAACGCAGCTGTTGTAC |

**Table S5. Contents of EMSAs in Figure 6**

| <b>Lane</b> | <b>Ascl1<br/>(pmoles)</b> | <b>Tcf3<br/>(pmoles)</b> | <b>Gsx2 N253A<br/>(pmoles)</b> | <b>probe<br/>(pmoles)</b> |
|-------------|---------------------------|--------------------------|--------------------------------|---------------------------|
| <b>1</b>    | 0                         | 0                        | 0                              | 0.04                      |
| <b>2</b>    | 2.5                       | 0                        | 0                              | 0.04                      |
| <b>3</b>    | 2.5                       | 0                        | 20                             | 0.04                      |
| <b>4</b>    | 2.5                       | 0                        | 40                             | 0.04                      |
| <b>5</b>    | 2.5                       | 0                        | 80                             | 0.04                      |
| <b>6</b>    | 0                         | 0                        | 0                              | 0.04                      |
| <b>7</b>    | 2.5                       | 0                        | 0                              | 0.04                      |
| <b>8</b>    | 0                         | 0.078125                 | 0                              | 0.04                      |
| <b>9</b>    | 2.5                       | 0.078125                 | 0                              | 0.04                      |
| <b>10</b>   | 2.5                       | 0.078125                 | 10                             | 0.04                      |
| <b>11</b>   | 2.5                       | 0.078125                 | 20                             | 0.04                      |
| <b>12</b>   | 2.5                       | 0.078125                 | 40                             | 0.04                      |
| <b>13</b>   | 2.5                       | 0.078125                 | 80                             | 0.04                      |
| <b>14</b>   | 0                         | 0                        | 0                              | 0.04                      |
| <b>15</b>   | 0                         | 0.3125                   | 0                              | 0.04                      |
| <b>16</b>   | 0.15625                   | 0.3125                   | 0                              | 0.04                      |
| <b>17</b>   | 0.15625                   | 0.3125                   | 10                             | 0.04                      |
| <b>18</b>   | 0.15625                   | 0.3125                   | 20                             | 0.04                      |
| <b>19</b>   | 0.15625                   | 0.3125                   | 40                             | 0.04                      |
| <b>20</b>   | 0.15625                   | 0.3125                   | 80                             | 0.04                      |
| <b>21</b>   | 0                         | 0                        | 80                             | 0.04                      |
| <b>22</b>   | 0                         | 0                        | 0                              | 0.04                      |

|           |       |        |    |      |
|-----------|-------|--------|----|------|
| <b>23</b> | 0.026 | 0      | 0  | 0.04 |
| <b>24</b> | 0     | 0.3125 | 0  | 0.04 |
| <b>25</b> | 0.026 | 0.3125 | 0  | 0.04 |
| <b>26</b> | 0.026 | 0.3125 | 20 | 0.04 |
| <b>27</b> | 0.026 | 0.3125 | 40 | 0.04 |
| <b>28</b> | 0.026 | 0.3125 | 80 | 0.04 |
| <b>29</b> | 0     | 0      | 0  | 0.04 |
| <b>30</b> | 0     | 0.3125 | 0  | 0.04 |
| <b>31</b> | 0     | 0.3125 | 20 | 0.04 |
| <b>32</b> | 0     | 0.3125 | 40 | 0.04 |
| <b>33</b> | 0     | 0.3125 | 80 | 0.04 |
